# Supplementary material
Source: publisher site journal article supplement (https://www.dovepress.com/article/538776)

**Supplementary Figure 1** Original gel images of Western-blot analysis.

MCP-1

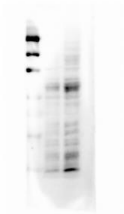

TGF- $\beta$ 1

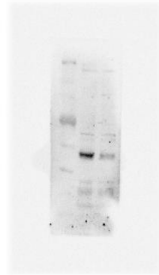

TNFSF14

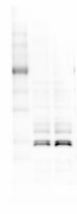

ARTN

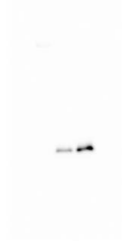

LIF-R

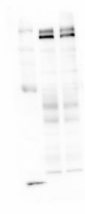

GAPDH

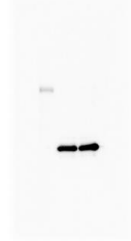

Supplement: Supplementary file 1 [file 538776%20Supplementary%20Material.pdf]
